# Supplementary material for: Space-by-time manifold representation of dynamic facial expressions for emotion categorization
Source: PubMed Central journal article supplement (PMC4927208; doi:10.1167/16.8.14), 2016-06-15
Supplement: i1534-7362-16-8-14-s01.pdf [file i1534-7362-16-8-14-s01.pdf]

## Supplementary Material

### Space-by-time manifold representation of dynamic facial expressions for emotion categorization

Ioannis Delis<sup>1,2\*</sup>, Chaona Chen<sup>3</sup>, Rachael E. Jack<sup>1,3</sup>, Oliver G. B. Garrod<sup>1</sup>, Stefano Panzeri<sup>4</sup>, Philippe G. Schyns<sup>1,3</sup>.

<sup>1</sup>Institute of Neuroscience and Psychology, School of Psychology, University of Glasgow, 58 Hillhead Street, Glasgow G12 8QB, United Kingdom

<sup>2</sup>Department of Biomedical Engineering, Columbia University, New York, NY 10027, USA

<sup>3</sup>School of Psychology, University of Glasgow, Glasgow G12 8QB, United Kingdom

<sup>4</sup>Laboratory of Neural Computation, Center for Neuroscience and Cognitive Systems @UniTn, Istituto Italiano di Tecnologia, Via Bettini 31, 38068 Rovereto (TN), Italy

\*Correspondence to: [ioannis.delis@columbia.edu](mailto:ioannis.delis@columbia.edu)

**Keywords:** emotion categorization, space-by-time manifold, NMF, mental representations, dynamic facial expressions

### Facial Action Units

The 42 Action Units (AUs) - representing specific facial movements performed by specific facial muscle[s] as described by the Facial Action Coding System [FACS] (Ekman, Friesen, & Hagar, 1978)- that we used to generate the facial expression stimuli used in our experiments are shown in Supplementary Table 1. All AUs are unilateral except for Cheek Raiser (AU6), Lid Tightener (AU7), Upper Lip Raiser (AU10), Lip Corner Puller (AU12), Dimpler (AU14), and Lip Stretcher (AU20) which are bilateral.

|                         |       |
|-------------------------|-------|
| Inner Brow Raiser       | AU1   |
| Inner-Outer Brow Raiser | AU1-2 |
| Outer Brow Raiser       | AU2   |
| Outer Brow Raiser Left  | AU2L  |
| Brow Lowerer            | AU4   |
| Upper Lid Raiser        | AU5   |
| Cheek Raiser            | AU6   |
| Cheek Raiser Left       | AU6L  |

|                                |           |
|--------------------------------|-----------|
| Cheek Raiser Right             | AU6R      |
| Lid Tightener Left             | AU7L      |
| Lid Tightener Right            | AU7R      |
| Nose Wrinkler                  | AU9       |
| Upper Lip Raiser               | AU10Open  |
| Upper Lip Raiser Left          | AU10LOpen |
| Upper Lip Raiser Right         | AU10ROpen |
| Nasolabial Deepener Left       | AU11L     |
| Nasolabial Deepener Right      | AU11R     |
| Lip Corner Puller              | AU12      |
| Lips Part-Lip Corner Puller    | AU12-25   |
| Lip Corner Puller Left         | AU12L     |
| Lip Corner Puller Right        | AU12R     |
| Sharp Lip Puller               | AU13      |
| Dimpler                        | AU14      |
| Dimpler Left                   | AU14L     |
| Dimpler Right                  | AU14R     |
| Lip Corner Depressor           | AU15      |
| Lower Lip Depressor            | AU16Open  |
| Chin Raiser                    | AU17      |
| Lip Stretcher                  | AU20      |
| Lip Stretcher Left             | AU20L     |
| Lip Stretcher Right            | AU20R     |
| Lip Funneler                   | AU22      |
| Lip Tightener                  | AU23      |
| Lip Pressor                    | AU24      |
| Lips Part                      | AU25      |
| Jaw Drop                       | AU26      |
| Mouth Stretch                  | AU27i     |
| Nostril Dilator                | AU38      |
| Nostril Compressor             | AU39      |
| Eyes Closed                    | AU43      |
| Lid Tightener                  | AU7       |
| Cheek Raiser-Lip Corner Puller | AU6-12    |

**Supplementary Table1:**The 42 Action Units.

### **Stimulus parameter sampling**

For each observer, we generated 2400 facial animations by selecting a subset of AUs and random values for the six temporal parameters. Although, the resulting stimuli cannot cover all possible combinations of AUs and temporal parameters, we selected the parameters in order to cover as much of the stimulus space as possible space using the following procedure. For the 2400 trials of each observer, we ensured that all AUs were active in approximately equal subsets of trials (each AU was active in 159 of the trials on average) and that all pairs of AUs were presented in 10 trials on average. On each trial, all temporal parameters were independently sampled uniformly from 0 to 1. Hence, given the above statistics, if we split the values of each parameter into e.g. 3 bins (0-0.33, 0.33-0.67, 0.67-1), each parameter bin appeared in around 53 (out of 159) trials for each AU. Onset latency, offset latency, acceleration and deceleration were scaled relative to peak latency in order to produce meaningful temporal waveforms representing plausible facial movements (see Yu, Garrod, & Schyns, 2012 for details).

### **Screening Questionnaire**

Each potential observer completed the following questionnaire. We selected only those answering 'no' to all questions for participation in the experiment.

1. Have you ever lived in non-Western\* country before (e.g. on a gap year, summer work, move due parental employment)?
2. How many weeks have you spent in a non-Western country (e.g. on vacation)?
3. Have you ever dated or had a very close friendship with a non-Western person?
4. Have you ever been involved with any non-Western culture societies/groups?

\*by Western groups/countries, we are referring to Europe (East and West), USA, Canada, United Kingdom, Australia and New Zealand.

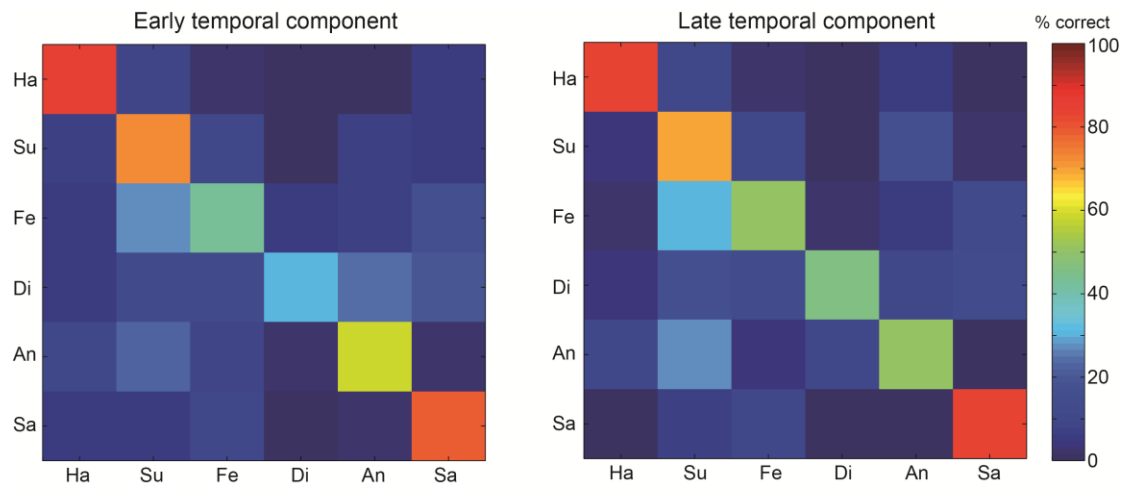

**Supplementary Figure 1:** The confusion matrices (averaged across subjects) for the discrimination of the six emotions using only the early temporal component (left) and only the late temporal component (right).

## References

- Yu, H., Garrod, O. G. B., & Schyns, P. G. (2012). Perception-driven facial expression synthesis. *Computers & Graphics-Uk*, 36(3), 152-162.
- Ekman, P., Friesen, W., & Hagar, J. C. (Eds.). (1978). *Facial Action Coding System Investigators Guide*. Salt Lake City: Research Nexus.
